# Supplementary material
Source: PubMed Central journal article supplement (PMC4464957)
Supplement: NIHMS687706-supplement-Supp_TableS1-S4.pdf [file NIHMS687706-supplement-Supp_TableS1-S4.pdf]

**Table S1.** Sequence reads and length generated for each RNA sample (paired end).

| Tissue Used for RNA   | Sequence Reads Per File | Average Read Length |
|-----------------------|-------------------------|---------------------|
| Bulb                  | 8,870,015               | 50                  |
| Flower                | 10,499,190              | 50                  |
| Leaf                  | 8,811,375               | 50                  |
| Fall Rhizome          | 10,558,614              | 50                  |
| Spring Rhizome        | 11,237,164              | 50                  |
| Fall Roots            | 8,026,623               | 50                  |
| Green Shoots          | 10,021,063              | 50                  |
| White Shoots          | 10,563,408              | 50                  |
| Tissue Culture Week 1 | 9,946,944               | 50                  |
| Tissue Culture Week 2 | 12,413,973              | 50                  |

**Table S2.** Transcriptome statistics provided by the NCGR.

|                |          |
|----------------|----------|
| Sequences      | 56994    |
| Bases          | 41106915 |
| Minimum length | 100      |
| Maximum length | 16273    |
| N50            | 1471     |
| B1000*         | 64.4%    |
| B2000**        | 35.9%    |

\*B1000 is the percent of scaffolds greater than 1000 bases and \*\*B2000 is the percent of scaffolds greater than 2000 bases.

**Table S3.** Selected top-scoring cytochrome P450 candidate cDNAs for the enzymatic conversion of cholesterol to cyclopamine.

| <b>Gene ID</b>             | <b>Putative function</b>                         |
|----------------------------|--------------------------------------------------|
| >medp_verca-20110208 2398  | similar to CYP71D unknown function*              |
| >medp_verca-20110208 31930 | similar to CYP71D unknown function               |
| >medp_verca-20110208 10041 | similar to CYP728 taxane 13a-hydroxylase*        |
| >medp_verca-20110208 13942 | similar to CYP734 brassinolide C-26 hydroxylase* |
| >medp_verca-20110208 13284 | similar to CYP90B1 steroid C-22 hydroxylase*+    |
| >medp_verca-20110208 18017 | similar to CYP90B1 steroid C-22 hydroxylase      |
| >medp_verca-20110208 18580 | similar to CYP90B1 steroid C-22 hydroxylase*+    |
| >medp_verca-20110208 2646  | similar to CYP90B1 steroid C-22 hydroxylase*     |
| >medp_verca-20110208 32399 | similar to CYP90B1 steroid C-22 hydroxylase      |
| >medp_verca-20110208 12709 | similar to CYP94D unknown function*              |

\*indicates contigs that were successfully cloned and tested

+contigs are homologs, and exhibited the same function

**Table S4.** Selected top-scoring transaminases in the steroid alkaloid biosynthetic pathway to cyclopamine.

| <b>Gene ID</b>             | <b>Putative function</b>                                   |
|----------------------------|------------------------------------------------------------|
| >medp_verca-20110208 12217 | aminotransferase ACS10                                     |
| >medp_verca-20110208 12084 | gamma aminobutyrate transaminase 1, mitochondrial-like*    |
| >medp_verca-20110208 5285  | 1-aminocyclopropane-1-carboxylate synthase                 |
| >medp_verca-20110208 28717 | aminotransferase ACS12-like*                               |
| >medp_verca-20110208 15871 | histidinol-phosphate aminotransferase, chloroplastic-like* |
| >medp_verca-20110208 10159 | cysteine desulfurase 1                                     |
| >medp_verca-20110208 1461  | methionine S-methyltransferase                             |

\*indicates contigs that were successfully cloned and tested.
